# Supplementary material
Source: ML conference proceedings conference paper supplement (https://openaccess.thecvf.com/content/CVPR2025/html/Liang_LoRASculpt_Sculpting_LoRA_CVPR_2025_paper.html)
Supplement: Supplementary file 1 [file Liang_LoRASculpt_Sculpting_LoRA_CVPR_2025_supplemental.pdf]

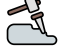

# LoRASculpt: Sculpting LoRA for Harmonizing General and Specialized Knowledge in Multimodal Large Language Models

## Supplementary Material

### A. Proof of Theorem 3.1

**Theorem 3.1.** Let  $B \in \mathbb{R}^{p \times r}$  and  $A \in \mathbb{R}^{r \times q}$  be two low rank matrices in LoRA, then the expected sparsity of the product matrix  $BA \in \mathbb{R}^{p \times q}$  is given by:

$$\mathbb{E}[s_{BA}] = 1 - (1 - s_B s_A)^r. \quad (12)$$

*Proof.* We aim to determine the expected proportion of non-zero elements in the product matrix  $BA \in \mathbb{R}^{p \times q}$ . The element in the  $i$ -th row and  $j$ -th column of  $BA$  is given by

$$(BA)_{ij} = \sum_{k=1}^r B_{ik} A_{kj}. \quad (13)$$

We will prove a stronger conclusion: we assume that all elements in  $A$  and  $B$  are nonnegative. This assumption increases the number of nonzero elements in  $BA$ , making it more challenging to ensure the sparsity of  $BA$ .

Then an element  $(BA)_{ij}$  is non-zero if and only if there exists at least one  $k \in \{1, 2, \dots, r\}$  such that both  $B_{ik}$  and  $A_{kj}$  are non-zero. For each  $k$ , the probability that  $B_{ik}$  is non-zero is  $s_B$ , and the probability that  $A_{kj}$  is non-zero is  $s_A$ . Since the positions of non-zero elements in  $B$  and  $A$  are independently and randomly distributed, the probability that both  $B_{ik}$  and  $A_{kj}$  are non-zero is

$$\mathbb{P}(B_{ik} \neq 0 \text{ and } A_{kj} \neq 0) = s_B s_A. \quad (14)$$

Therefore, the probability that  $B_{ik} A_{kj} = 0$  is

$$\mathbb{P}(B_{ik} A_{kj} = 0) = 1 - s_B s_A. \quad (15)$$

Assuming independence across different  $k$ , the probability that all terms  $B_{ik} A_{kj}$  are zero is

$$\mathbb{P}\left(\bigcap_{k=1}^r \{B_{ik} A_{kj} = 0\}\right) = \prod_{k=1}^r \mathbb{P}(B_{ik} A_{kj} = 0) = (1 - s_B s_A)^r. \quad (16)$$

Thus, the probability that  $(BA)_{ij}$  is non-zero is

$$\begin{aligned} \mathbb{P}((BA)_{ij} \neq 0) &= 1 - \mathbb{P}((BA)_{ij} = 0) \\ &= 1 - (1 - s_B s_A)^r. \end{aligned} \quad (17)$$

Since there are  $p \times q$  elements in  $BA$ , the expected number of non-zero elements is

$$\mathbb{E}[N_{BA}] = pq[1 - (1 - s_B s_A)^r], \quad (18)$$

where  $N_{BA}$  denotes the number of non-zero elements in  $BA$ .

The expected sparsity of  $BA$  is then

$$\mathbb{E}[s_{BA}] = \frac{\mathbb{E}[N_{BA}]}{pq} = 1 - (1 - s_B s_A)^r. \quad (19)$$

The proof of Theorem 3.1 is finished. □

### B. Proof of Theorem 3.2

**Theorem 3.2.** Let  $B \in \mathbb{R}^{p \times r}$  and  $A \in \mathbb{R}^{r \times q}$  be two low rank matrices in LoRA, where the sparsity of  $B$  is  $s_B$  and the sparsity of  $A$  is  $s_A$ . Define  $C = BA$ , with sparsity  $s_C$ . Then, for any  $\delta > 0$ :

$$\mathbb{P}(|s_C - \mathbb{E}[s_C]| \geq \delta) \leq 2 \exp\left(-\frac{2\delta^2 pq}{r(p+q)}\right), \quad (20)$$

where the expected sparsity  $\mathbb{E}[s_C]$  is given by Theorem 3.1

*Proof.* We aim to apply McDiarmid's inequality to the total number of nonzero entries  $N$  in  $C$ .

**McDiarmid's Inequality** states that if  $X_1, X_2, \dots, X_n$  are independent random variables taking values in a set  $\mathcal{X}$ , and  $f : \mathcal{X}^n \rightarrow \mathbb{R}$  satisfies the bounded differences condition: for all  $i$  and all  $x_1, \dots, x_n, x'_i \in \mathcal{X}$ ,

$$|f(x_1, \dots, x_i, \dots, x_n) - f(x_1, \dots, x'_i, \dots, x_n)| \leq c_i,$$

then for all  $\epsilon > 0$ ,

$$\mathbb{P}(f(X_1, \dots, X_n) - \mathbb{E}[f] \geq \epsilon) \leq \exp\left(-\frac{2\epsilon^2}{\sum_{i=1}^n c_i^2}\right),$$

and similarly for  $\mathbb{P}(\mathbb{E}[f] - f(X_1, \dots, X_n) \geq \epsilon)$ .

In our context, consider the function  $f$  representing the total number of nonzero entries in  $C$ :

$$N = \sum_{i=1}^p \sum_{j=1}^q X_{ij}, \quad (21)$$

where  $X_{ij}$  is the indicator variable:

$$X_{ij} = \begin{cases} 1, & \text{if } C_{ij} \neq 0, \\ 0, & \text{if } C_{ij} = 0. \end{cases} \quad (22)$$

Each  $C_{ij}$  depends on the random variables  $\{B_{ik}, A_{kj}\}_{k=1}^r$ . The variables  $B_{ik}$  and  $A_{kj}$  are independent and affect  $N$  through  $C_{ij}$ .

We have the bounded differences:

**Effect of changing  $B_{ik}$ :** Changing  $B_{ik}$  can affect all  $C_{ij}$  where  $j = 1, \dots, q$ . The maximum change in  $N$  due to changing  $B_{ik}$  is  $c_{B_{ik}} = q$ .

**Effect of changing  $A_{kj}$ :** Changing  $A_{kj}$  can affect all  $C_{ij}$  where  $i = 1, \dots, p$ . The maximum change in  $N$  due to changing  $A_{kj}$  is  $c_{A_{kj}} = p$ .

Therefore, the sum of the squares of the bounded differences is:

$$\sum_{i,k} c_{B_{ik}}^2 + \sum_{k,j} c_{A_{kj}}^2 = pr \cdot q^2 + rq \cdot p^2 = rpq(p+q). \quad (23)$$

Applying McDiarmid's inequality, for any  $\epsilon > 0$ :

$$\mathbb{P}(N - \mathbb{E}[N] \geq \epsilon) \leq \exp\left(-\frac{2\epsilon^2}{rpq(p+q)}\right), \quad (24)$$

and similarly for  $\mathbb{P}(\mathbb{E}[N] - N \geq \epsilon)$ . Therefore,

$$\mathbb{P}(|N - \mathbb{E}[N]| \geq \epsilon) \leq 2 \exp\left(-\frac{2\epsilon^2}{rpq(p+q)}\right). \quad (25)$$

Since  $s_C = \frac{N}{pq}$ , we have:

$$|s_C - \mathbb{E}[s_C]| = \frac{|N - \mathbb{E}[N]|}{pq}. \quad (26)$$

Let  $\delta = \frac{\epsilon}{pq}$ , so  $\epsilon = \delta pq$ . Substituting back into the inequality:

$$\begin{aligned} \mathbb{P}(|s_C - \mathbb{E}[s_C]| \geq \delta) &\leq 2 \exp\left(-\frac{2(\delta pq)^2}{rpq(p+q)}\right) \\ &= 2 \exp\left(-\frac{2\delta^2 pq}{r(p+q)}\right). \end{aligned} \quad (27)$$

The proof of Theorem 3.2 is finished.  $\square$

### C. Proof of Theorem D.1

**Theorem D.1.** Consider matrices  $A \in \mathbb{R}^{r \times q}$  and  $B \in \mathbb{R}^{p \times r}$ , where each row of  $B$  and each column of  $A$  exhibit uniform sparsity internally but vary across rows and columns, respectively, with average sparsities  $s_A$  and  $s_B$ . Then, the expected proportion  $\mathbb{E}[s_C]$  of nonzero entries in the product matrix  $C = BA$  satisfies:

$$\mathbb{E}[s_C] \leq 1 - (1 - s_A s_B)^r. \quad (28)$$

*Proof.* Consider any entry  $c_{ij}$  of the matrix  $C = BA$ , which is computed as:

$$c_{ij} = \sum_{k=1}^r b_{ik} a_{kj}. \quad (29)$$

To determine the probability that  $c_{ij}$  is nonzero, we analyze the sparsity of  $b_{ik}$  and  $a_{kj}$ .

For fixed  $i$  and  $j$ , we define:  $s_{B_i}$  is the sparsity of the  $i$ -th row of  $B$ ;  $s_{A_j}$  is the sparsity of the  $j$ -th column of  $A$ .

For  $b_{ik}$  and  $a_{kj}$ , we have:

$$\mathbb{P}(b_{ik} \neq 0) = s_{B_i}, \quad \mathbb{P}(a_{kj} \neq 0) = s_{A_j}. \quad (30)$$

Since the positions of nonzero elements within the  $i$ -th row of  $B$  and the  $j$ -th column of  $A$  are independently and uniformly distributed, the events that  $b_{ik}$  and  $a_{kj}$  are nonzero are independent for each  $k$ . Therefore, the probability that both  $b_{ik}$  and  $a_{kj}$  are nonzero is:

$$\mathbb{P}(b_{ik} \neq 0 \text{ and } a_{kj} \neq 0) = s_{B_i} s_{A_j}. \quad (31)$$

Same as the proof for Theorem 3.1, we prove a stronger conclusion by assuming that all elements in  $A$  and  $B$  are nonnegative. Thus, for  $c_{ij} = 0$ , it must hold that for all  $k = 1, 2, \dots, r$ , either  $b_{ik} = 0$  or  $a_{kj} = 0$ . Consequently,

the probability that  $c_{ij} = 0$  is:

$$\begin{aligned} \mathbb{P}(c_{ij} = 0) &= \prod_{k=1}^r [1 - \mathbb{P}(b_{ik} \neq 0 \text{ and } a_{kj} \neq 0)] \\ &= (1 - s_{B_i} s_{A_j})^r. \end{aligned} \quad (32)$$

Thus, the probability that  $c_{ij}$  is nonzero is:

$$\begin{aligned} \mathbb{P}(c_{ij} \neq 0) &= 1 - \mathbb{P}(c_{ij} = 0) \\ &= 1 - (1 - s_{B_i} s_{A_j})^r. \end{aligned} \quad (33)$$

Therefore, the expected proportion of nonzero entries in  $C$  is:

$$\mathbb{E}[s_C] = \frac{1}{pq} \sum_{i=1}^p \sum_{j=1}^q [1 - (1 - s_{B_i} s_{A_j})^r]. \quad (34)$$

Note that for  $x \in [0, 1]$  and  $r \geq 1$ , the function  $f(x) = (1 - x)^r$  is convex. According to Jensen's Inequality, for a convex function  $f$  and a random variable  $X$ , we have:

$$\mathbb{E}[f(X)] \geq f(\mathbb{E}[X]). \quad (35)$$

In our case, let the random variables be  $X_{ij} = s_{B_i} s_{A_j}$ , then:

$$\begin{aligned} \mathbb{E}[X] &= \frac{1}{pq} \sum_{i=1}^p \sum_{j=1}^q X_{ij} \\ &= \left( \frac{1}{p} \sum_{i=1}^p s_{B_i} \right) \left( \frac{1}{q} \sum_{j=1}^q s_{A_j} \right) \\ &= s_B s_A. \end{aligned} \quad (36)$$

Applying Jensen's Inequality, we obtain:

$$\frac{1}{pq} \sum_{i=1}^p \sum_{j=1}^q (1 - s_{B_i} s_{A_j})^r \geq (1 - s_B s_A)^r. \quad (37)$$

That is:

$$\begin{aligned} 1 - \mathbb{E}[s_C] &= \frac{1}{pq} \sum_{i=1}^p \sum_{j=1}^q (1 - s_{B_i} s_{A_j})^r \\ &\geq (1 - s_B s_A)^r. \end{aligned} \quad (38)$$

From the inequality above, we have:

$$\mathbb{E}[s_C] \leq 1 - (1 - s_B s_A)^r. \quad (39)$$

The proof of Theorem 3.3 is finished.  $\square$

### D. Proof of LoRASculpt Sparsity Guarantee

We first demonstrate that incorporating Knowledge-Guided Regularization impacts the sparsity structure of the low-rank LoRA matrices. Specifically, each row of  $B$  maintains uniform sparsity, though different rows have varied sparsity levels; similarly, each column of  $A$  has consistent sparsity within itself, while sparsity varies across columns. The overall sparsity of the two low-rank matrices remains at  $s_B$  and  $s_A$  following one-shot pruning. For the partial derivative of the  $(i, j)$ -th element of the delta weight  $BA$ , we have

the following expression:

$$\frac{\partial \mathcal{L}_{CMR}^2}{\partial (BA)_{ij}} = 2 \cdot M_{ij}^2 \cdot \sum_k B_{ik} A_{kj}, \quad (40)$$

This indicates that the penalty on the  $(i, j)$ -th position in the delta weight  $BA$  affects the  $i$ -th row of  $B$  and the  $j$ -th column of  $A$ . Consequently,  $B$  is constrained by rows, and  $A$  by columns, resulting in varying sparsity across the rows of  $B$  and the columns of  $A$ . Under this condition, the following theorem holds:

**Theorem D.1.** Consider matrices  $A \in \mathbb{R}^{r \times q}$  and  $B \in \mathbb{R}^{p \times r}$ , where each row of  $B$  and each column of  $A$  exhibit uniform sparsity internally but vary across rows and columns, respectively, with average sparsities  $s_A$  and  $s_B$ . Then, the expected proportion  $\mathbb{E}[s_C]$  of nonzero entries in the product matrix  $C = BA$  satisfies:

$$\mathbb{E}[s_C] \leq 1 - (1 - s_A s_B)^r. \quad (41)$$

*Proof.* See Appendix C.  $\square$

Despite the non-uniform sparsity of matrices  $B$  and  $A$  across rows and columns, where different rows of  $B$  and different columns of  $A$  exhibit varied distributions, we can still assume the independence of updates across all elements. This does not hinder the application of McDiarmid’s inequality, thereby allowing us to obtain the previously established error bounds in Theorem 3.2. Thus, we have established the sparsity guarantees of LoRASculpt.

## E. Algorithm of LoRASculpt

The algorithm is outlined in Algorithm 1. Please refer to Sec. 3.2 for more details.

## F. Addition Evaluation Details

### Details of Compared Baselines

- (a) LoRA [ICLR’22] [17]: Introduces low-rank adapters to efficiently fine-tune large models.
- (b) DoRA [ICML’24] [39]: Enhances the learning capacity and training stability of LoRA by decomposing weights into magnitude and direction.
- (c) Orth-Reg [ECCV’24] [18]: Adds an orthogonal regularization with a hyperparameter (*i.e.*, 1e-3) to LoRA weights, encouraging fine-tuned features to be orthogonal to pretrained features to preserve model generalization. For fair comparison and due to resource constraints, the component that involves multiple LoRA modules is excluded.
- (d) L2-Regularization [PNAS’17] [28]: Apply  $L_2$  regularization with a hyperparameter (*i.e.*, 1e-3) to the LoRA weights, guiding the fine-tuned model closer to the pretrained model thus reducing forgetting.
- (e) DARE [ICML’24] [73]: Parameters from the fine-tuned LoRA weights are randomly selected and re-scaled to mitigate knowledge conflict of the target task and other tasks.

### Algorithm 1: LoRASculpt

---

**Input:** Training Steps  $T$ , Warmup Steps  $T_{\text{warmup}}$ , Training data  $\mathcal{D}_{\text{tr}}$ , Sparsity Ratio  $s_A, s_B$ , Number of Layer in LLM and Connector  $L_{\text{LLM}}, L_{\text{Con}}$ , Option of whether training Connector with LoRA Flag  $\text{Flag}_{\text{Con}}$ .

**Output:** Final LoRA weights.

$\mathcal{L}_{CMR}^{\text{LLM}} \leftarrow 0, \quad \mathcal{L}_{CMR}^{\text{Con}} \leftarrow 0;$

$S \leftarrow \psi(W) = \left| 1 / \log \left( \frac{|W|}{\|W\|_2} + \epsilon \right) \right|;$  ▷ Eq. (6)

$M \leftarrow \tanh(\omega \odot S);$  ▷ Eq. (7)

**for**  $t = 1, 2, \dots, T$  **do**

Sample a batch  $(x^{\text{vision}}, x^{\text{text}}, y)$  in  $\mathcal{D}_{\text{tr}};$

**if**  $t \geq T_{\text{warmup}}$  **then**

**if**  $t = T_{\text{warmup}}$  **then**

$M_A \leftarrow \text{Mask}(A, s_A);$

$M_B \leftarrow \text{Mask}(B, s_B);$  ▷ Eq. (3)

**end**

$A \leftarrow M_A \odot A;$

$B \leftarrow M_B \odot B;$  ▷ Eq. (2)

**end**

$h^{\text{vision}} = \varphi_{\text{Con}} \circ \varphi_{\text{Vis}}(x^{\text{vision}}), h^{\text{text}} = \text{Tokenize}(x^{\text{text}});$

$\mathcal{L}_{\text{Task}} \leftarrow \mathcal{L}_{\text{CE}}(\Phi[h^{\text{vision}}, h^{\text{text}}], y);$

**for**  $l = 1, 2, \dots, L_{\text{LLM}}$  **do**

$\mathcal{L}_{CMR}^{\text{LLM}} \leftarrow \mathcal{L}_{CMR}^{\text{LLM}} + \|M_l \odot (B_l A_l)\|_F;$  ▷ Eq. (8)

**end**

**if**  $\text{Flag}_{\text{Con}} = \text{True}$  **then**

**for**  $\bar{l} = 1, 2, \dots, L_{\text{Con}}$  **do**

$\mathcal{L}_{CMR}^{\text{Con}} \leftarrow \mathcal{L}_{CMR}^{\text{Con}} + \|M_{\bar{l}} \odot (B_{\bar{l}} A_{\bar{l}})\|_1;$  ▷ Eq. (10)

**end**

**end**

$\mathcal{L} = \mathcal{L}_{\text{Task}} + \alpha \cdot \mathcal{L}_{CMR}^{\text{LLM}} + \beta \cdot \mathcal{L}_{CMR}^{\text{Con}};$  ▷ Eq. (11)

Update low-rank adapters to minimize  $\mathcal{L};$

**end**

**return** Fine-tuned LoRA in  $\Phi$  (and  $\varphi_{\text{Con}}$ )

---

- (f) Model Tailor [ICML’24] [84]: Retains pretrained parameters while selectively replacing a small portion (*i.e.*, 10%) of fine-tuned parameters, guided by salience and sensitivity analysis.

### Evaluation Metric.

To evaluate the performance of MLLMs in general and specialized knowledge, we compute the source performance (denotes by *Source*) and target performance (denotes by *Target*):

$$\text{Source} = \frac{1}{|\mathcal{D}|} \sum_i^{\mathcal{D}} \text{Score}(\mathcal{D}_i), \quad \text{Target} = \text{Score}(\mathcal{T}). \quad (42)$$

where  $\text{Score}(\cdot)$  denotes the evaluation metric for different datasets, which is set to Accuracy and CIDEr for VQA and Captioning tasks, respectively. Here,  $\mathcal{D} = \{\mathcal{D}_i\}_{i=1}^{|\mathcal{D}|}$  represents the datasets used to evaluate general knowledge, and  $\mathcal{T}$  denotes the downstream task dataset. We use the average

score of *Source* and *Target*, denoted as *Avg* to measure the overall capability of the MLLM.

### G. Ablation Study of $\beta$

$\beta$  controls the sparsity strength for MLLM connector in Eq. (11). Since the connector plays a crucial role in modality alignment, adopting a high sparsity level could lead to performance degradation on downstream tasks (denoted by *Target* in Tab. I). Selecting an appropriate  $\beta$  to sparsify the connector can achieve a balance between *Source* and *Target*.

| $\beta$       | $10^{-2}$ | $10^{-3}$ | $10^{-4}$ | $10^{-5}$    | $10^{-6}$ |
|---------------|-----------|-----------|-----------|--------------|-----------|
| <i>Source</i> | 60.19     | 58.58     | 59.73     | 59.55        | 59.13     |
| <i>Target</i> | 80.10     | 79.99     | 84.02     | 85.34        | 85.01     |
| <i>Avg</i>    | 70.15     | 69.29     | 71.87     | <b>72.45</b> | 72.07     |

Table I. **Ablation Study of  $\beta$** , which represents the intensity of sparsity applied to the MLLM connector. When set to  $10^{-5}$ , the optimal *Avg* is achieved.
